# Supplementary material for: The synthesis of self-assembled polycrystalline 1-D CuO nanostructures in aqueous medium and a study of their multifunctional features
Source: Royal Society of Chemistry journal article supplement (doi:10.1039/c3ce42552e), 2014-01-01
Supplement: c3ce42552e.pdf [file c3ce42552e.pdf]

## Electronic Supplementary information

### Synthesis of self-assembled polycrystalline 1-D CuO nanostructures in aqueous medium and study of their multifunctional features

Umesh Kumar Gaur,<sup>a</sup> Anil Kumar<sup>a,b</sup> and G D Varma<sup>a,c</sup>

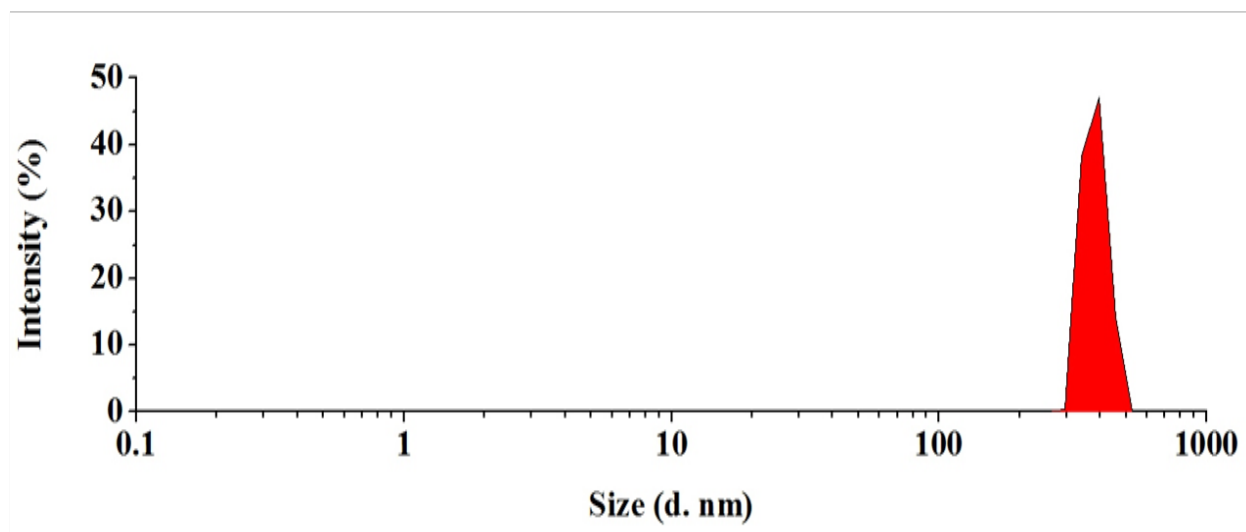

**Fig. S1†** Hydrodynamic size distribution for CuO nanostructures heated at higher temperature

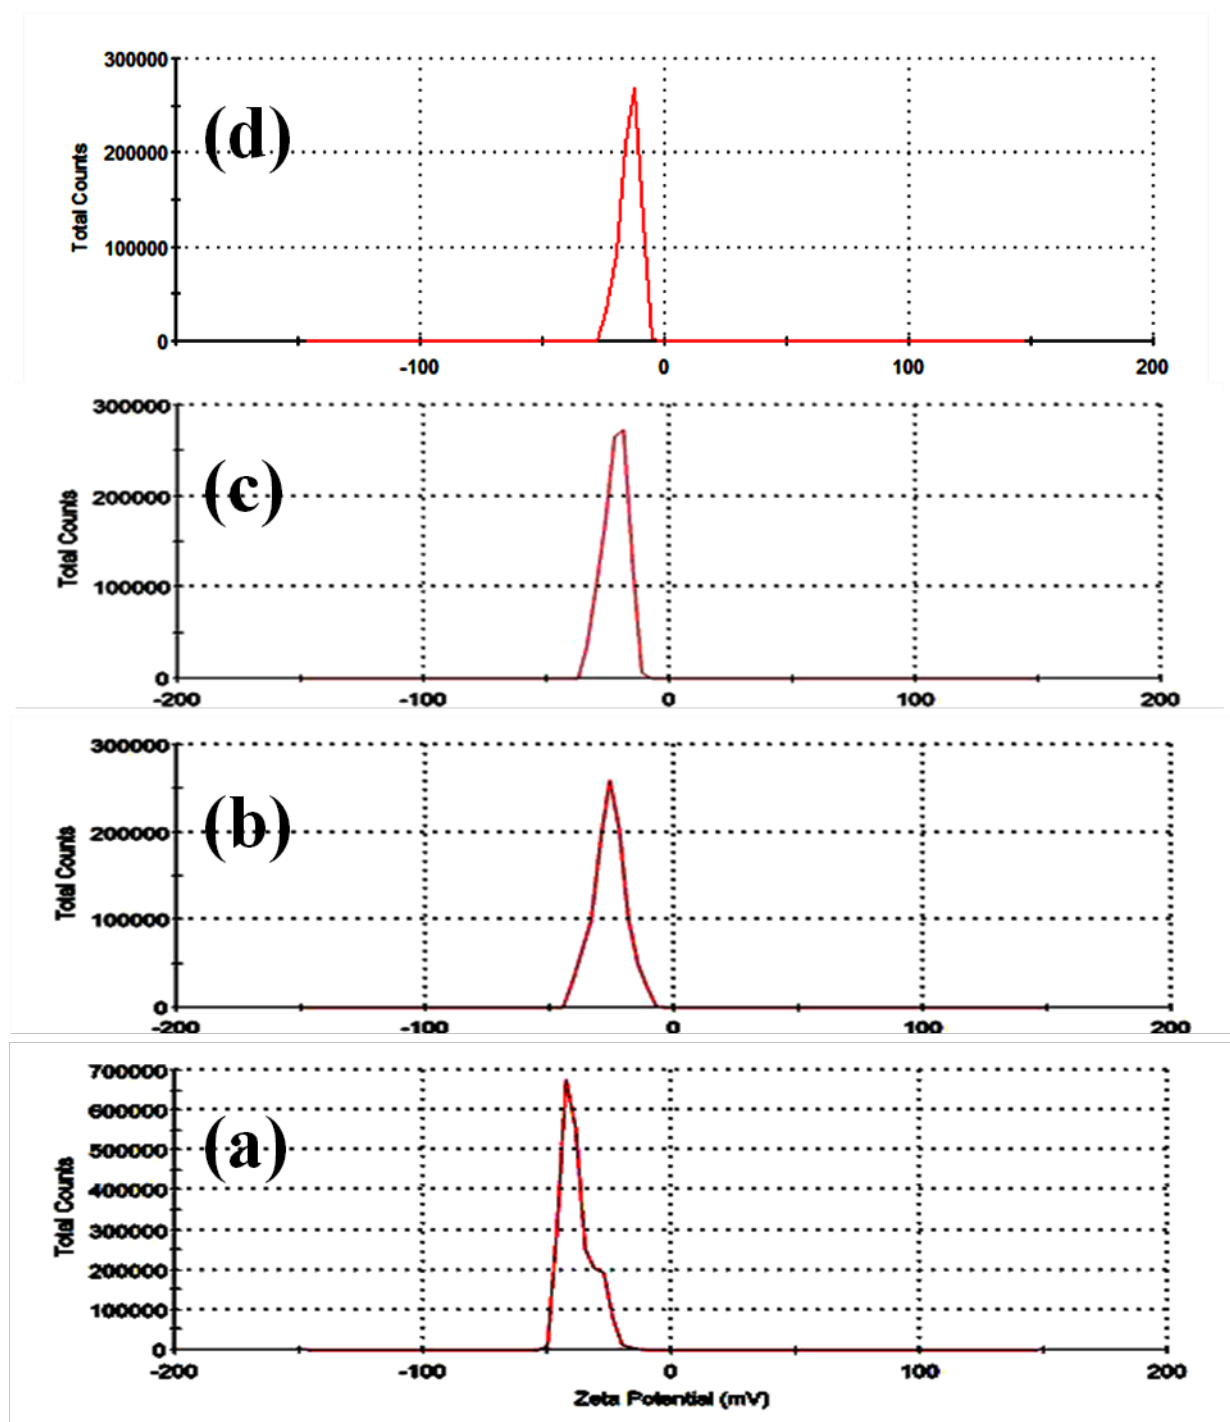

**Fig. S2†** Plot for the values of zeta potential for: Cu(OH)<sub>2</sub> precursor (a), 3 h heated sample (b), 10 h heated sample (c) and 200°C heated sample (d)

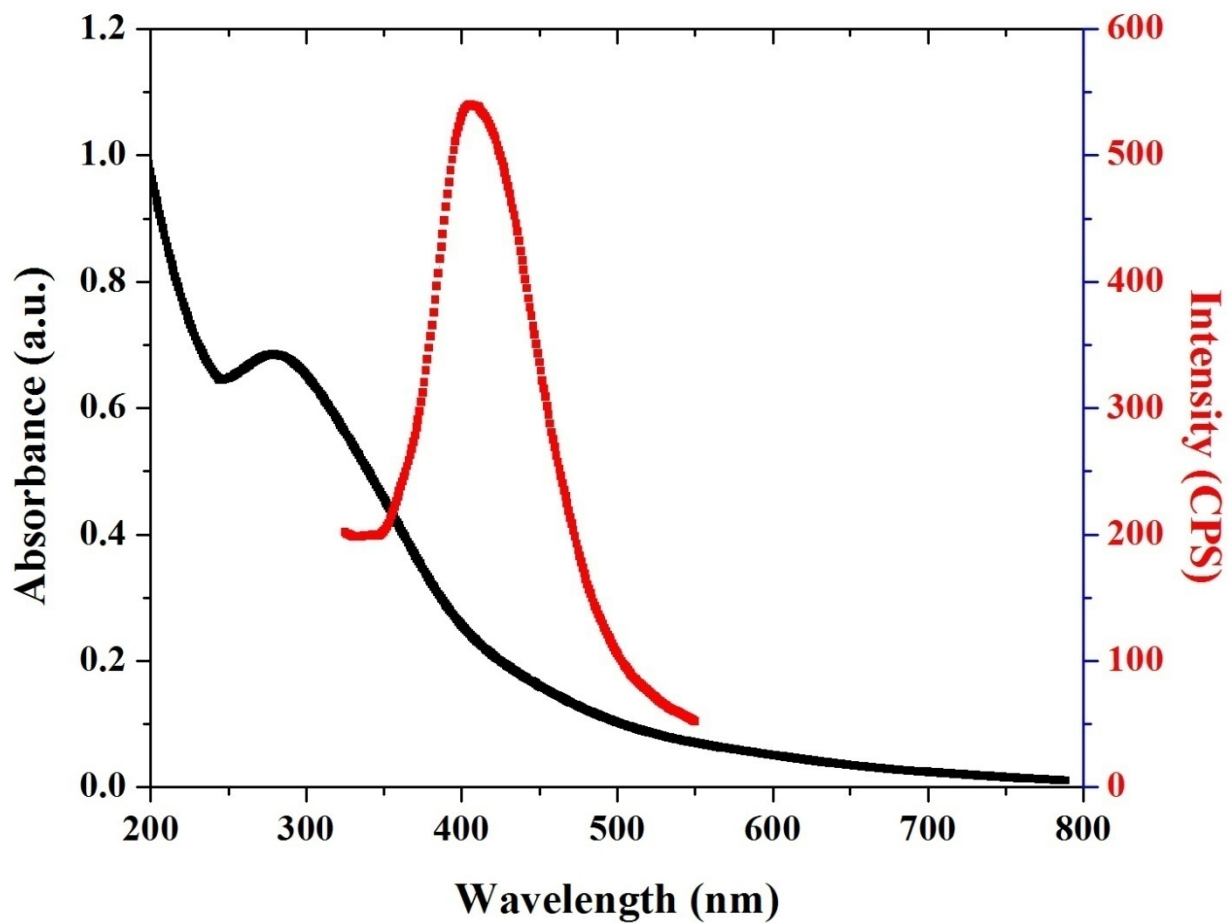

**Fig. S3** UV-VIS absorbance and Emission spectra of 3 h heated CuO nanoparticles
